# Supplementary material for: A General Route for Growing Metal Sulfides onto Graphene Oxide and Exfoliated Graphite Oxide
Source: MDPI journal article supplement (doi:10.3390/nano7090245), 2017-08-31
Supplement: s1 [file s1]

## Supplementary Materials

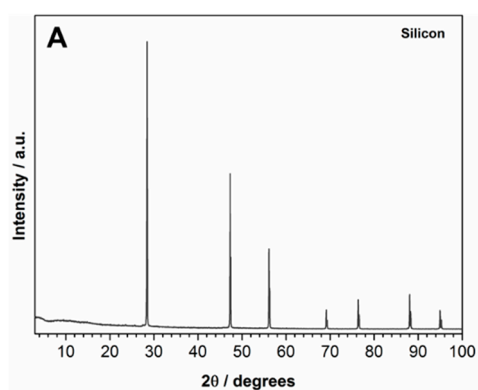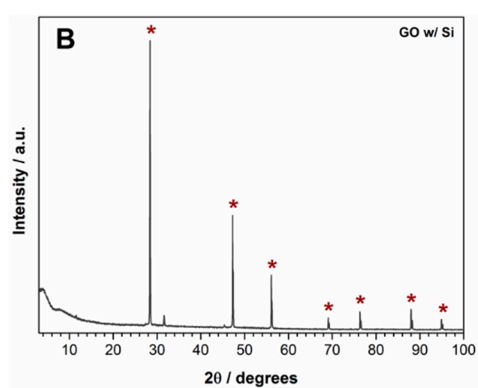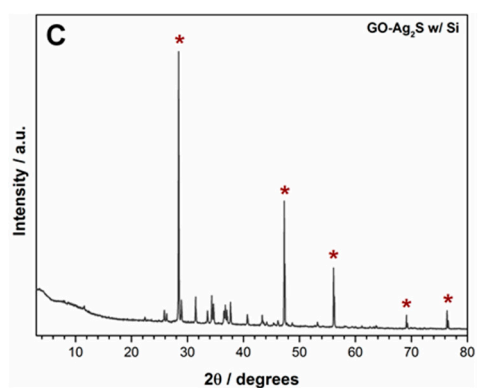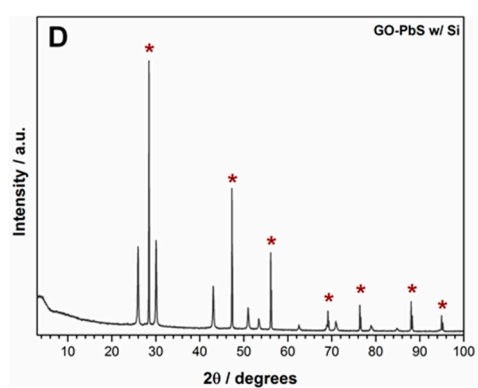

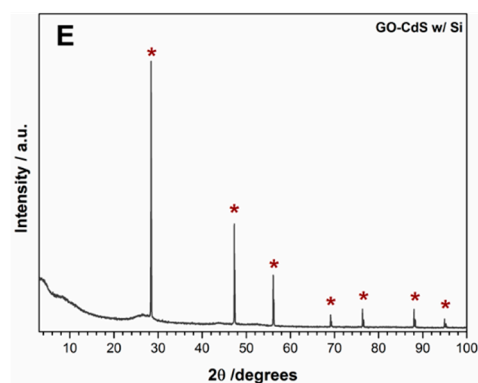

**Figure S1.** (A-E) Powder XRD patterns of GO/MS hybrid nanostructures as indicated, with Si as internal reference (marked as \*).

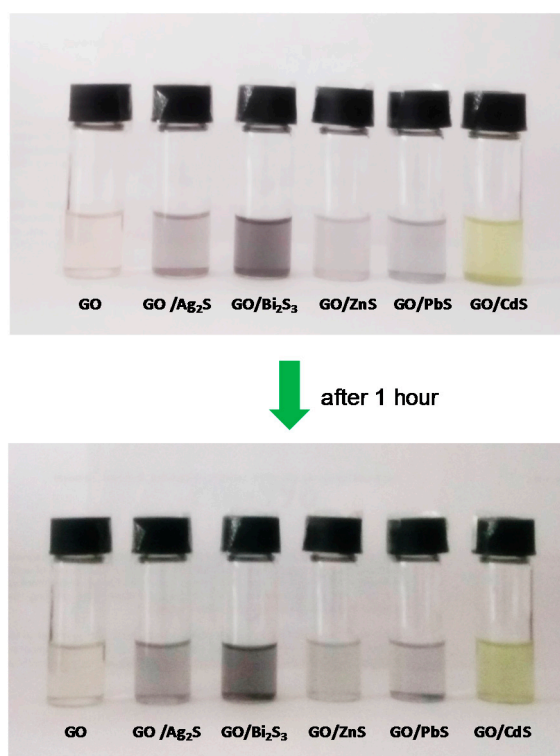

**Figure S2.** Ethanolic suspensions of GO/metal sulfide (0.05 mg/ mL) after preparation and 1 h standing.

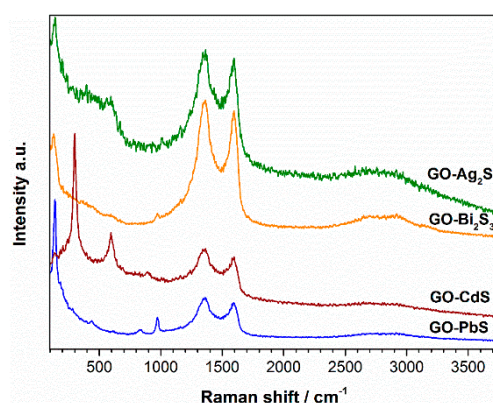

**Figure S3.** Raman spectra of GO sheets and derived hybrid nanostructures having the indicated metal sulfide.

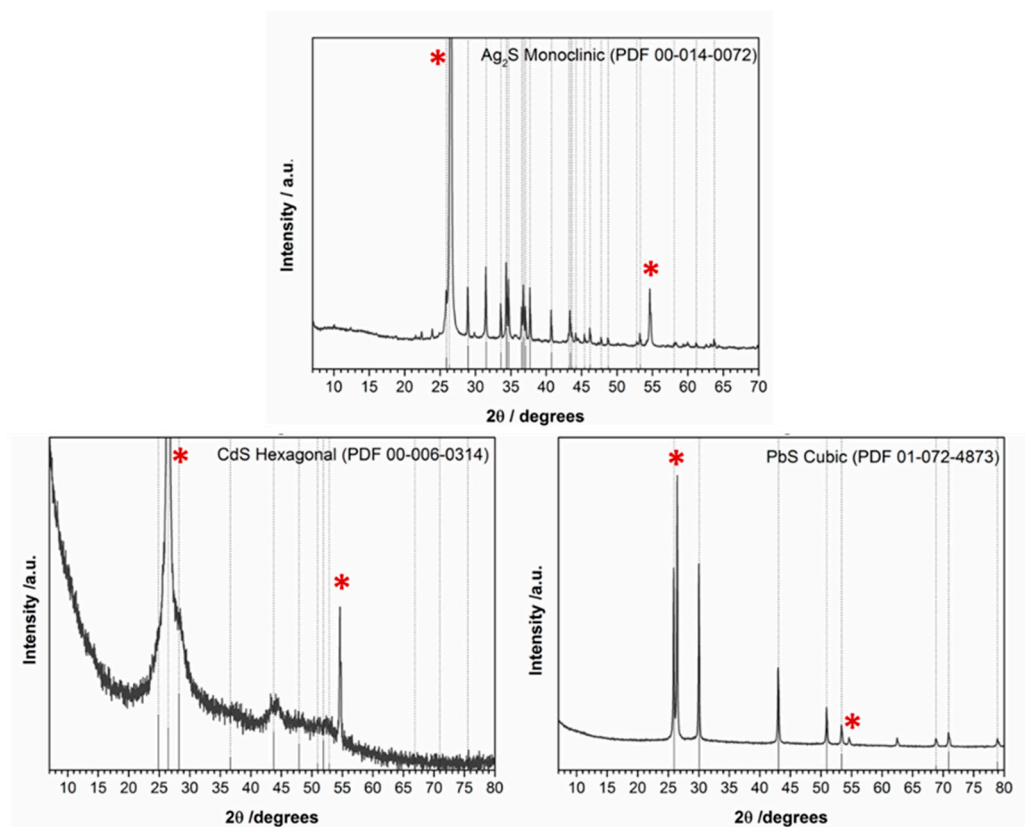

**Figure S4.** Powder XRD patterns of EGO/MS hybrid nanostructures. The vertical lines correspond to the standard diffractions peaks attributed to the respective metal sulfide and the diffraction peaks assigned to EGO are marked with \*
